# Supplementary material for: Reasonable access: important characteristics and perceived quality of legal and illegal sources of cannabis for medical purposes in Canada
Source: Springer Nature journal article supplement (doi:10.1186/s42238-023-00185-w), 2023-06-09
Supplement: MOESM1 [file 42238_2023_185_MOESM1_ESM-1.pdf]

**Additional File 1. Perceived quality of cannabis products and services: dimensions and related items**

|                                                                                                                                                                                                                                                                                                                                                                                                                                                                                                                                                                                                                                                                                                                             |
|-----------------------------------------------------------------------------------------------------------------------------------------------------------------------------------------------------------------------------------------------------------------------------------------------------------------------------------------------------------------------------------------------------------------------------------------------------------------------------------------------------------------------------------------------------------------------------------------------------------------------------------------------------------------------------------------------------------------------------|
| <p><b>1. Quality of medical cannabis products</b> (1 = very poor to 5 = very good)</p> <ul style="list-style-type: none"> <li>• Presentation (humidity; appearance; grind)</li> <li>• Potency (THC content)</li> <li>• Strains (selection of strains; availability of preferred strains)</li> <li>• Availability of cannabis products (edibles, tinctures, etc.)</li> <li>• Effectiveness</li> <li>• Overall product satisfaction</li> </ul>                                                                                                                                                                                                                                                                                |
| <p><b>2. Quality of care and service</b> (1 = strongly disagree to 5 = strongly agree)</p> <ul style="list-style-type: none"> <li>• They always listen to what I have to say;</li> <li>• They understand my needs;</li> <li>• There are opportunities for me to provide feedback;</li> <li>• I find it easy to talk with them; they answer my questions;</li> <li>• They explain things in a way that I can understand;</li> <li>• I believe they care about me;</li> <li>• I talk with them about things that are happening in my life, not just about my medical condition or cannabis products;</li> <li>• I get personalized attention from them; and</li> <li>• I have built a good relationship with them.</li> </ul> |
| <p><b>3. Quality of expertise and support</b> (1 = strongly disagree to 5 = strongly agree)</p> <ul style="list-style-type: none"> <li>• I can rely on them to be well trained and qualified;</li> <li>• They carry out their tasks competently;</li> <li>• They provide thorough explanations about the medicine and different ways to take it;</li> <li>• They make good recommendations for strains and products most appropriate for my particular condition and symptoms;</li> <li>• They help me to keep track of the cannabis strains and products I have used; and</li> <li>• They support me to meet my needs around medical cannabis.</li> </ul>                                                                  |
| <p><b>4. Administrative quality and accessibility</b> (1 = strongly disagree to 5 = strongly agree)</p> <ul style="list-style-type: none"> <li>• I receive medical cannabis in a timely manner;</li> <li>• Generally, appointments run on time;</li> <li>• They have responded to my calls or other inquiries in a timely manner;</li> <li>• The registration procedures are accurate;</li> <li>• I believe is well managed;</li> <li>• The hours of operation meet my needs;</li> <li>• The location is convenient;</li> <li>• The options for accessing medical cannabis meet my needs (i.e., mail, in-person); and</li> <li>• I feel safe getting cannabis through this source</li> </ul>                                |
| <p><b>5. Affordability</b> (1 = strongly disagree; 5 = strongly agree)</p>                                                                                                                                                                                                                                                                                                                                                                                                                                                                                                                                                                                                                                                  |
| <ul style="list-style-type: none"> <li>• The cannabis and associated costs are affordable</li> </ul>                                                                                                                                                                                                                                                                                                                                                                                                                                                                                                                                                                                                                        |
| <p><b>6. Overall Satisfaction</b> (1 = completely unsatisfied and 5 = completely satisfied)</p>                                                                                                                                                                                                                                                                                                                                                                                                                                                                                                                                                                                                                             |
| <ul style="list-style-type: none"> <li>• How would you rate your overall satisfaction with the following sources</li> </ul>                                                                                                                                                                                                                                                                                                                                                                                                                                                                                                                                                                                                 |
